# Supplementary material for: Spatial Transcriptomic Analysis of Focal and Normal Areas of Myocyte Disarray in Human Hypertrophic Cardiomyopathy
Source: Preprints.org preprint supplement (doi:10.20944/preprints202307.0139.v1), 2023-07-04
Supplement: Supplementary file 1 [file supplementary]

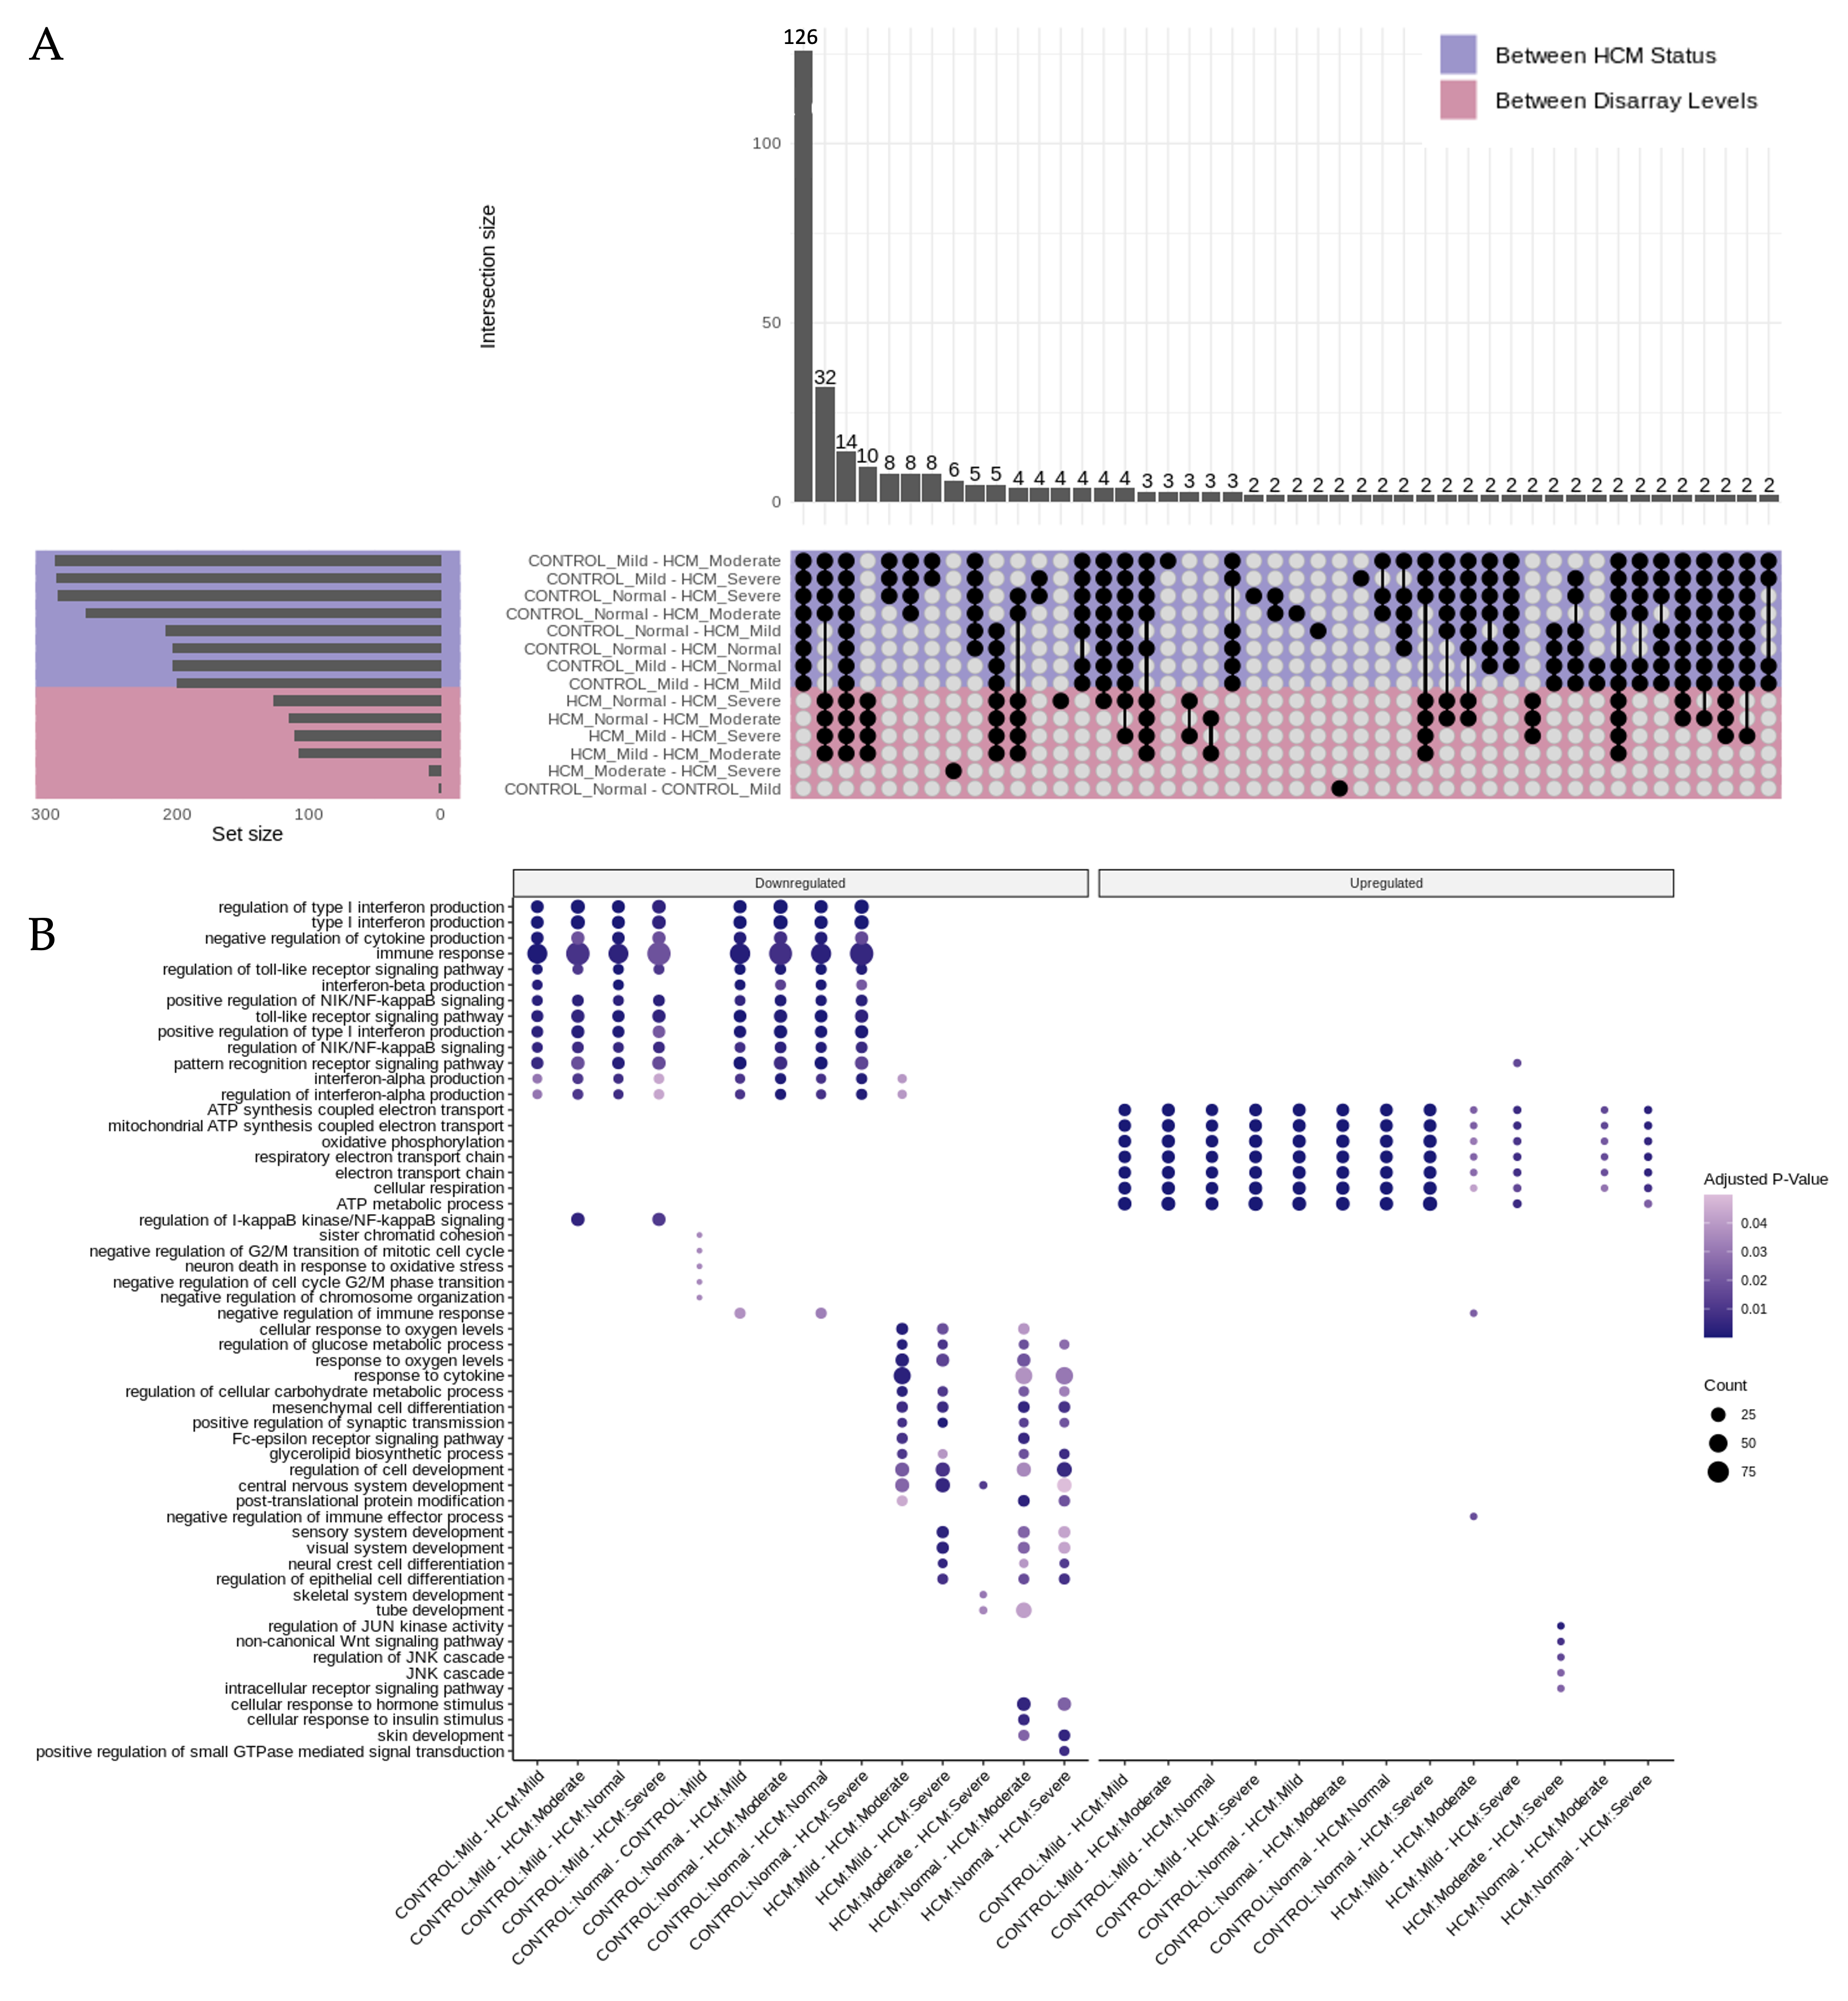


Supplemental Figure 1. Identification of Differentially Expressed Genes Between All Areas of Myocyte Disarray. A. UpSet plot revealing the differentially expressed gene overlap between all disarray comparisons. Comparisons between control patients and HCM patients are highlighted in purple and comparisons within HCM status are highlighted in pink. B. Gene ontology enrichment dot plot of significant annotations per comparison for all disarray comparisons. Only differentially expressed genes that had an FDR adjusted p-value below 0.05 were enriched per disarray comparison.


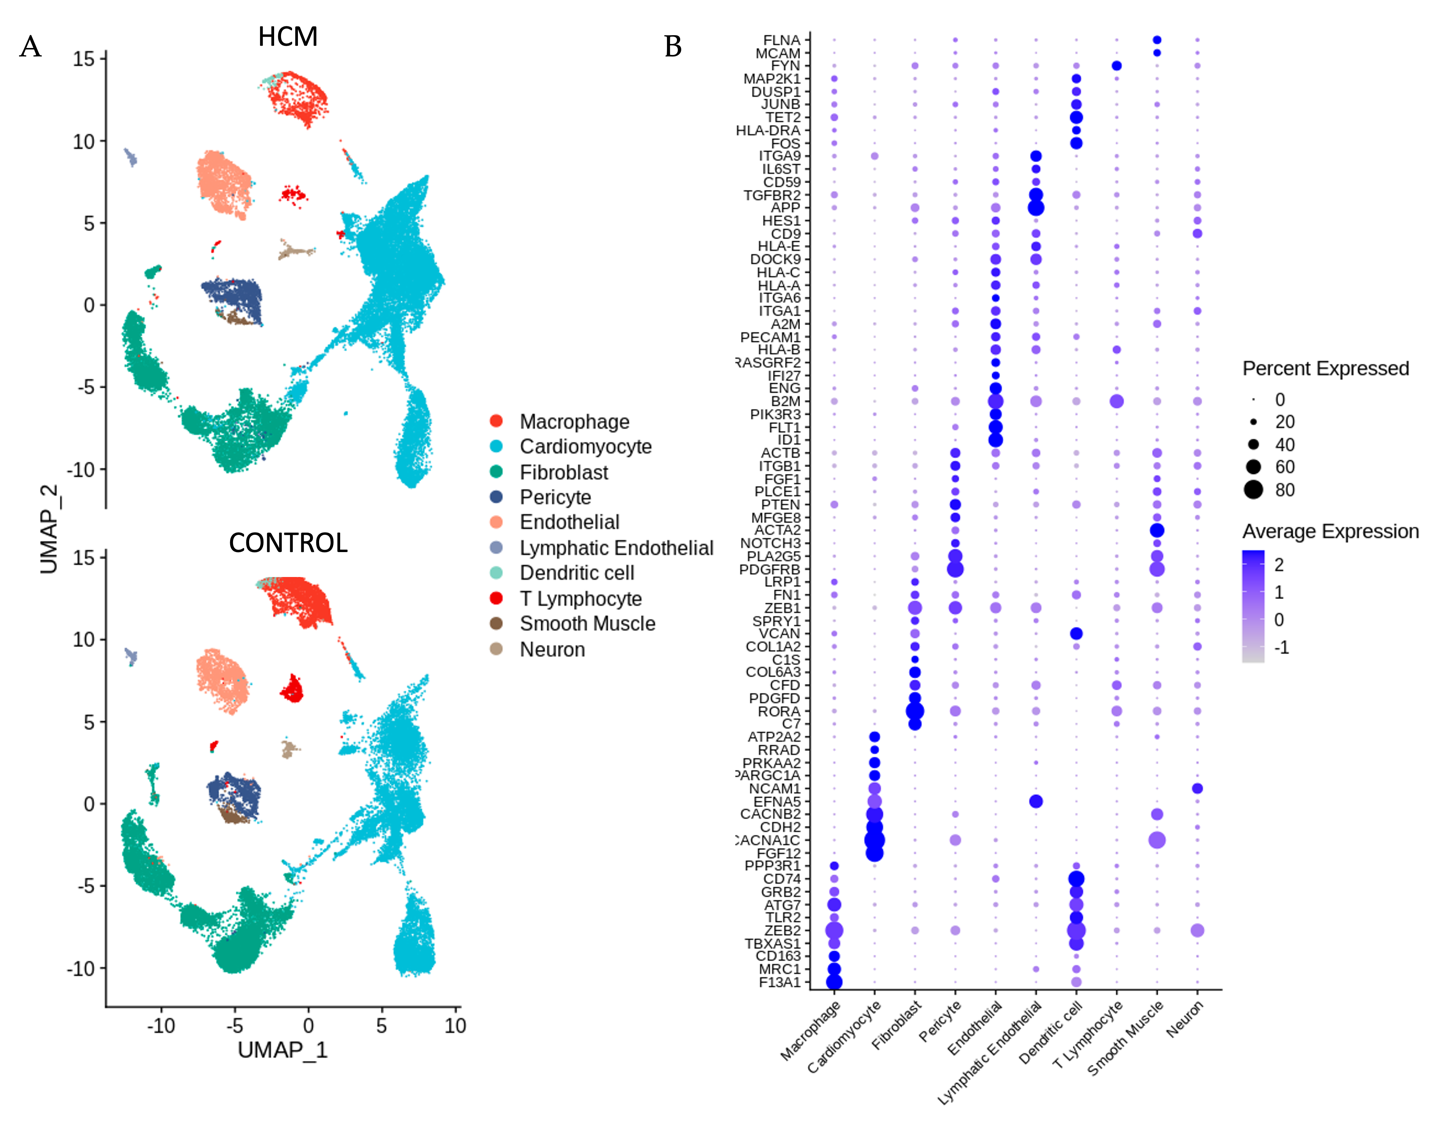


Supplemental Figure 2. Identification of Overlapping of Overlapping Cell Marker Genes Between GeoMx ROI data and Matched SnRNA-seq Data. A. UMAP plot showing cell clusters and cell identity assignments separated by disease label. B. Dot plot showing the expression of overlapping cell marker genes present in both the GeoMx ROI data and the matched SnRNA-seq data.
